# Supplementary material for: Optimizing Provider Recruitment for Influenza Surveillance Networks
Source: PLOS journal article supplement (doi:10.1371/journal.pcbi.1002472), 2012-04-12
Supplement: S6 (10.1371/journal.pcbi.1002472.s006) [file journal.pcbi.1002472.s006]

301 Moved Permanently

# Moved Permanently

The document has moved here.

---

Apache Server at www.ploscompbiol.org Port 80
